# Supplementary material
Source: PubMed Central journal article supplement (PMC8550901)
Supplement: mmc1.pdf [file mmc1.pdf]

# THE LANCET

## Rheumatology

### Supplementary appendix

This appendix formed part of the original submission and has been peer reviewed. We post it as supplied by the authors.

Supplement to: Frey S, Connolly CM, Po-Yu Chiang T, et al. Antibody kinetics in patients with rheumatic diseases after SARS-CoV-2 mRNA vaccination. *Lancet Rheumatol* 2021; published online Sept 28. [https://doi.org/10.1016/S2665-9913\(21\)00282-4](https://doi.org/10.1016/S2665-9913(21)00282-4).

**Appendix 1. Demographic and clinical characteristics of patients with RMD after two-dose SARS-CoV-2 mRNA vaccination, stratified by anti-SARS-CoV-2 RBD antibody-response after three- months.**

|                                                         | <b>Overall<sup>1</sup></b><br>(n=809) | <b>Negative (n=56)<sup>1</sup></b> | <b>Low-positive<sup>1</sup></b><br>(n=77) | <b>High-positive (n=676)<sup>1</sup></b> |
|---------------------------------------------------------|---------------------------------------|------------------------------------|-------------------------------------------|------------------------------------------|
| <b>Age, median (IQR)</b>                                | 49 (39,59)                            | 50.5 (41.4, 58.8)                  | 52.3 (40.0, 61.7)                         | 48.0 (38.6, 58.7)                        |
| <b>Female sex, no. (%)<sup>2</sup></b>                  | 745 (92.0)                            | 51 (91.1)                          | 72 (93.5)                                 | 622 (92.3)                               |
| <b>Non-white, no. (%)<sup>2</sup></b>                   | 61 (7.5)                              | 8 (14.3)                           | 7 (9.3)                                   | 46 (6.9)                                 |
| <b>Diagnosis, no. (%)</b>                               |                                       |                                    |                                           |                                          |
| Inflammatory arthritis <sup>3</sup>                     | 355 (43.8)                            | 14 (25.0)                          | 31 (40.3)                                 | 310 (45.9)                               |
| Systemic lupus erythematosus                            | 147 (18.2)                            | 13 (23.2)                          | 12 (15.6)                                 | 122 (18.0)                               |
| Sjögren's syndrome                                      | 39 (4.8)                              | 3 (5.4)                            | 2 (2.6)                                   | 34 (5.0)                                 |
| Myositis                                                | 44 (5.4)                              | 5 (8.9)                            | 8 (10.4)                                  | 31 (4.6)                                 |
| Vasculitis <sup>4</sup>                                 | 16 (1.9)                              | 4 (7.1)                            | 3 (3.9)                                   | 9 (1.3)                                  |
| Systemic sclerosis                                      | 8 (1)                                 | 2 (3.6)                            | 0 (0.0)                                   | 6 (0.9)                                  |
| Overlap connective tissue disease <sup>5</sup>          | 188 (23.2)                            | 12 (21.4)                          | 20 (26.0)                                 | 156 (23.1)                               |
| Other <sup>6</sup>                                      | 12 (1.5)                              | 3 (5.4)                            | 1 (1.3)                                   | 8 (1.2)                                  |
| <b>Vaccine, no. (%)</b>                                 |                                       |                                    |                                           |                                          |
| Pfizer/BioNTech                                         | 436 (53.9)                            | 34 (61)                            | 50 (65)                                   | 352 (52.1)                               |
| Moderna                                                 | 376 (46.4)                            | 22 (39)                            | 27 (35)                                   | 327 (47.9)                               |
| <b>Days from D2 to 1mo testing, median (IQR)</b>        | 29 (28,32)                            | 29 (28,33)                         | 29 (28, 32)                               | 29 (28,32)                               |
| <b>Days from D2 to 3mo testing, median (IQR)</b>        | 91 (87,94)                            | 91 (87, 94)                        | 91 (87, 93)                               | 91 (87, 94)                              |
| <b>Therapy included in regimen, no. (%)<sup>7</sup></b> |                                       |                                    |                                           |                                          |
| <b>Conventional DMARD</b>                               |                                       |                                    |                                           |                                          |
| Azathioprine                                            | 58 (7.2)                              | 6 (10.7)                           | 6 (7.8)                                   | 46 (6.8)                                 |
| Hydroxychloroquine                                      | 322 (39.8)                            | 17 (30.4)                          | 27 (35.1)                                 | 278 (41.1)                               |
| Leflunomide                                             | 33 (4.1)                              | 2 (3.6)                            | 3 (3.9)                                   | 28 (4.1)                                 |
| Methotrexate                                            | 209 (25.8)                            | 14 (25.0)                          | 19 (24.7)                                 | 176 (26.0)                               |
| Mycophenolate <sup>8</sup>                              | 114 (14.1)                            | 16 (28.5)                          | 19 (24.7)                                 | 79 (11.6)                                |
| Sulfasalazine                                           | 35 (4.3)                              | 2 (3.6)                            | 2 (2.6)                                   | 31 (4.6)                                 |
| Tacrolimus                                              | 11 (1.3)                              | 0 (0.0)                            | 5 (6.5)                                   | 6 (0.9)                                  |
| <b>Biologic</b>                                         |                                       |                                    |                                           |                                          |
| Belimumab                                               | 83 (10.2)                             | 3 (5.4)                            | 8 (10.4)                                  | 72 (10.7)                                |
| <b>Interleukin inhibitors</b>                           |                                       |                                    |                                           |                                          |
| Anakinra                                                | 2 (0.3)                               | 0 (0.0)                            | 0 (0.0)                                   | 2 (0.3)                                  |
| IL-6 inhibitors <sup>9</sup>                            | 10 (1.2)                              | 0 (0.0)                            | 2 (2.6)                                   | 8 (1.2)                                  |
| IL-17 inhibitors <sup>10</sup>                          | 19 (2.3)                              | 0 (0.0)                            | 1 (1.3)                                   | 18 (2.7)                                 |

|                                |            |           |           |            |
|--------------------------------|------------|-----------|-----------|------------|
| Ustekinumab                    | 14 (1·7)   | 0 (0·0)   | 0 (0·0)   | 14 (2·1)   |
| JAK inhibitor <sup>11</sup>    | 50 (6·1)   | 1 (1·7)   | 1 (1·3)   | 48 (7·1)   |
| Rituximab                      | 52 (6·4)   | 33 (58·9) | 11 (14·3) | 8 (1·2)    |
| TNF inhibitor <sup>12</sup>    | 173 (21·4) | 5 (8·9)   | 23 (29·9) | 145 (21·4) |
| Immunomodulatory <sup>13</sup> | 43 (5·3)   | 2 (3·6)   | 14 (18·2) | 27 (4·0)   |
| Glucocorticoid <sup>14</sup>   | 227 (28)   | 26 (46·4) | 32 (41·6) | 169 (25)   |

1 The percentages in these columns are shown as percent of each category in the overall column. Negative antibody response was defined per manufacturer data as Roche Elecsys anti-RBD pan Ig <0·8 units/mL. Low-positive antibody response was defined as anti-RBD pan Ig 0·8-50 units/mL. High-positive antibody response was defined as anti-RBD pan Ig >50 units/mL.

2 The denominators for these categories differ from the total N as 1 participant selected “prefer not to answer” for sex, 8 selected “prefer not to answer” for race, 2 did not respond to the vaccine manufacturer question, and 1 did not respond to the prior COVID-19 diagnosis question.

3 Rheumatoid arthritis, ankylosing spondylitis, psoriatic arthritis, reactive arthritis, or inflammatory bowel disease associated arthritis

4 Polyarteritis nodosa, Behcet's syndrome, polymyalgia rheumatica, temporal arteritis, eosinophilic granulomatosis polyangiitis, granulomatous polyangiitis, Henoch-Schonlein purpura, microscopic polyangiitis, or Takayasu arteritis

5 Denotes combination of two or more of inflammatory arthritis, systemic lupus erythematosus, Sjögren's syndrome, myositis, vasculitis and systemic sclerosis

6 Other denotes participants with Adult onset Still's disease, undifferentiated connective tissue disease, or sarcoidosis

7 Patients could select >1 medication, thus n>809

8 Mycophenolate includes mycophenolic acid and mycophenolate mofetil.

9 Interleukin (IL)-6 inhibitors include sarilumab and tocilizumab.

10 IL-17 inhibitors include ixekizumab and secukinumab.

11 Janus kinase (JAK) inhibitors include tofacitinib and upadacitinib.

12 TNF inhibitors include adalimumab, certolizumab, etanercept, golimumab, and infliximab.

13 Immunomodulatory includes intravenous immunoglobulin (IVIg) and subcutaneous Immunoglobulin (SCIg).

14 Glucocorticoid includes prednisone and prednisone equivalents.

**Appendix 2. Clinical characteristics of 15 patients with de novo antibody response at three months following two-dose SARS-CoV-2 vaccination**

| Age | Sex    | Diagnosis                                      | Therapy                                                                                              | 1 Month Titer | 3 Month Titer |
|-----|--------|------------------------------------------------|------------------------------------------------------------------------------------------------------|---------------|---------------|
| 62  | Female | Overlap connective tissue disease <sup>1</sup> | Azathioprine<br>Belimumab<br>Glucocorticoid <sup>2</sup><br>Hydroxychloroquine                       | <0-40         | 1-30          |
| 37  | Female | Myositis                                       | Azathioprine<br>Glucocorticoid <sup>1</sup><br>Tacrolimus                                            | <0-40         | 2-70          |
| 63  | Female | Scleroderma, Vasculitis <sup>3</sup>           | Mycophenolate <sup>4</sup>                                                                           | <0-40         | 2-70          |
| 50  | Female | Systemic lupus erythematosus                   | Glucocorticoid <sup>2</sup><br>Hydroxychloroquine<br>IVIg<br>Mycophenolate <sup>4</sup><br>Rituximab | <0-40         | 6-00          |
| 40  | Female | Systemic lupus erythematosus                   | Belimumab<br>Hydroxychloroquine<br>Glucocorticoid <sup>2</sup><br>Mycophenolate <sup>4</sup>         | <0-40         | 6-40          |
| 70  | Female | Myositis                                       | Hydroxychloroquine<br>IVIg<br>Mycophenolate <sup>4</sup>                                             | <0-40         | 7-50          |
| 39  | Female | Systemic lupus erythematosus                   | Hydroxychloroquine<br>Mycophenolate <sup>4</sup><br>Glucocorticoid <sup>2</sup>                      | 0-76          | 7-70          |
| 34  | Female | Myositis                                       | Azathioprine<br>IVIg                                                                                 | <0-40         | 10-10         |
| 37  | Female | Vasculitis <sup>3</sup>                        | Mycophenolate <sup>4</sup><br>Tacrolimus                                                             | <0-40         | 15-80         |
| 60  | Female | Vasculitis <sup>3</sup>                        | Mycophenolate <sup>4</sup>                                                                           | <0-40         | 60-30         |
| 30  | Female | Overlap connective tissue disease <sup>1</sup> | Hydroxychloroquine<br>Mycophenolate <sup>4</sup>                                                     | <0-40         | 80-70         |
| 43  | Female | Overlap connective tissue disease <sup>1</sup> | Glucocorticoid <sup>2</sup><br>Mycophenolate <sup>4</sup><br>Tacrolimus                              | <0-40         | 146-00        |
| 48  | Female | Systemic lupus erythematosus                   | Glucocorticoid <sup>2</sup><br>Hydroxychloroquine, Mycophenolate <sup>4</sup><br>Tacrolimus          | 0-43          | 174-30        |
| 52  | Female | Myositis                                       | Hydroxychloroquine<br>Mycophenolate <sup>3</sup><br>Glucocorticoid <sup>2</sup>                      | <0-40         | 216-90        |
| 65  | Female | Overlap connective tissue disease <sup>1</sup> | Mycophenolate <sup>4</sup>                                                                           | <0-40         | 249-00        |

1 Denotes combination of two or more of inflammatory arthritis, systemic lupus erythematosus, Sjögren's syndrome, myositis, vasculitis and systemic sclerosis

2 Glucocorticoid includes prednisone and prednisone equivalents.

3 Polyarteritis nodosa, Behcet's syndrome, polymyalgia rheumatica, temporal arteritis, eosinophilic granulomatosis polyangiitis, granulomatous polyangiitis, Henoch-Schonlein purpura, microscopic polyangiitis, or Takayasu arteritis

4 Mycophenolate includes mycophenolic acid and mycophenolate mofetil.
